# Supplementary material for: Classification and Prognosis Analysis of Pancreatic Cancer Based on DNA Methylation Profile and Clinical Information
Source: MDPI journal article supplement (doi:10.3390/genes13101913), 2022-10-21
Supplement: s1 [file s1]

**Table S3.** Top 15 significant results of multivariate cox regression analysis

| <b>Gene.name</b> | <b>Hazard.Ratio</b> | <b>p.value</b> |
|------------------|---------------------|----------------|
| <i>IL20RB</i>    | 0.024058797         | <0.001         |
| <i>MYEOV</i>     | 0.011066403         | <0.001         |
| <i>ANKRD57</i>   | 0.027997057         | <0.001         |
| <i>FAM83A</i>    | 0.028973563         | 0.001          |
| <i>HIST1H2BK</i> | 0.023579432         | 0.001          |
| <i>PLAU</i>      | 0.052454276         | 0.001          |
| <i>C11orf34</i>  | 0.040479933         | 0.002          |
| <i>EXTL1</i>     | 0.008051021         | 0.003          |
| <i>SPATA21</i>   | 0.052794781         | 0.003          |
| <i>SMG6</i>      | 0.021086653         | 0.005          |
| <i>FCRLA</i>     | 0.040093744         | 0.006          |
| <i>MAP4K5</i>    | 0.148089138         | 0.006          |
| <i>SLC39A2</i>   | 0.038290701         | 0.007          |
| <i>CAPN2</i>     | 0.009838279         | 0.007          |
| <i>EVC</i>       | 5.350443069         | 0.008          |

P-value corrected for multiple tests using the Benjamini–Hochberg method. The hazard ratio (HR) of the COX model shown. The HR is relative, and sites with value > 1 and < 1 are considered to be associated with poor and good prognosis, respectively.
