# Supplementary material for: Classification and Prognosis Analysis of Pancreatic Cancer Based on DNA Methylation Profile and Clinical Information
Source: MDPI journal article supplement (doi:10.3390/genes13101913), 2022-10-21
Supplement: s1 [file s1]

**Table S5.** Characteristic pathways of methylated genes in subtypes

| <b>cluster</b> | <b>MyList</b>      | <b>Biological Process (GO)</b>                                                                                                                                                                                              |
|----------------|--------------------|-----------------------------------------------------------------------------------------------------------------------------------------------------------------------------------------------------------------------------|
| 1              | <i>LOC728392</i>   | None                                                                                                                                                                                                                        |
| 1              | <i>EVC</i>         | GO:0003416 endochondral bone growth;GO:0098868 bone growth;GO:0045880 positive regulation of smoothened signaling pathway                                                                                                   |
| 1              | <i>HOXB4</i>       | GO:0048103 somatic stem cell division;GO:0048539 bone marrow development;GO:0060218 hematopoietic stem cell differentiation                                                                                                 |
| 2              | <i>CAPN8</i>       | GO:0007586 digestion;GO:0006508 proteolysis;GO:0019538 protein metabolic process                                                                                                                                            |
| 2              | <i>CSTA</i>        | GO:0018149 peptide cross-linking;GO:0030216 keratinocyte differentiation;GO:0009913 epidermal cell differentiation                                                                                                          |
| 2              | <i>GSDMC</i>       | GO:0070269 pyroptosis;GO:0042742 defense response to bacterium;GO:0009617 response to bacterium                                                                                                                             |
| 2              | <i>HEBP1</i>       | GO:0007623 circadian rhythm;GO:0048511 rhythmic process;GO:0008150 biological_process                                                                                                                                       |
| 2              | <i>HRH1</i>        | GO:0032962 positive regulation of inositol trisphosphate biosynthetic process;GO:0032960 regulation of inositol trisphosphate biosynthetic process;GO:0071420 cellular response to histamine                                |
| 2              | <i>KRTAP2.4</i>    | None                                                                                                                                                                                                                        |
| 2              | <i>MAP4K5</i>      | GO:0000165 MAPK cascade;GO:0006468 protein phosphorylation;GO:0016310 phosphorylation                                                                                                                                       |
| 2              | <i>MIR135B</i>     | GO:1904754 positive regulation of vascular associated smooth muscle cell migration;GO:1905564 positive regulation of vascular endothelial cell proliferation;GO:0014911 positive regulation of smooth muscle cell migration |
| 2              | <i>SLAMF7</i>      | GO:0042267 natural killer cell mediated cytotoxicity;GO:0002228 natural killer cell mediated immunity;GO:0001909 leukocyte mediated cytotoxicity                                                                            |
| 2              | <i>UCA1</i>        | GO:0010468 regulation of gene expression;GO:0060255 regulation of macromolecule metabolic process;GO:0019222 regulation of metabolic process                                                                                |
| 2              | <i>SNORD114.29</i> | None                                                                                                                                                                                                                        |
