# Supplementary material for: Classification and Prognosis Analysis of Pancreatic Cancer Based on DNA Methylation Profile and Clinical Information
Source: MDPI journal article supplement (doi:10.3390/genes13101913), 2022-10-21
Supplement: s1 [file s1]

**Table S2.** Examples of top15 significant univariate cox regression results

| <b>Gene.name</b> | <b>Hazard.Ratio</b> | <b>95% Confidence interval</b> | <b>p.value</b> |
|------------------|---------------------|--------------------------------|----------------|
| <i>C11orf34</i>  | 0.03                | 0-0.18                         | <0.001         |
| <i>IL20RB</i>    | 0.03                | 0.01-0.14                      | <0.001         |
| <i>MYEOV</i>     | 0.01                | 0-0.12                         | <0.001         |
| <i>ANKRD57</i>   | 0.03                | 0-0.21                         | 0.001          |
| <i>FAM83A</i>    | 0.02                | 0-0.21                         | 0.001          |
| <i>HIST1H2BK</i> | 0.02                | 0-0.22                         | 0.001          |
| <i>PLAU</i>      | 0.05                | 0.01-0.33                      | 0.002          |
| <i>SLC39A2</i>   | 0.03                | 0-0.29                         | 0.003          |
| <i>CAPN2</i>     | 0.01                | 0-0.21                         | 0.004          |
| <i>EXTL1</i>     | 0.01                | 0-0.22                         | 0.004          |
| <i>FCRLA</i>     | 0.03                | 0-0.33                         | 0.004          |
| <i>HOXC12</i>    | 36.64               | 2.94-457.35                    | 0.005          |
| <i>CHST4</i>     | 0.1                 | 0.02-0.51                      | 0.006          |
| <i>MAP4K5</i>    | 0.14                | 0.04-0.56                      | 0.006          |
