# Supplementary material for: Classification and Prognosis Analysis of Pancreatic Cancer Based on DNA Methylation Profile and Clinical Information
Source: MDPI journal article supplement (doi:10.3390/genes13101913), 2022-10-21
Supplement: s1 [file s1]

**Table S4.** Top 20 differentially methylated genes among pancreatic cancer subtypes

| <b>Gene Name</b>   | <b>DE-<math>\beta</math></b> | <b>P</b> | <b>adjustP</b> |
|--------------------|------------------------------|----------|----------------|
| <i>MIR135B</i>     | -0.2454                      | 5.15E-28 | 4.02E-26       |
| <i>CAPN8</i>       | -0.2683                      | 4.45E-25 | 1.16E-23       |
| <i>FAM25A</i>      | -0.1329                      | 4.27E-25 | 1.16E-23       |
| <i>CAPN2</i>       | -0.1055                      | 3.46E-24 | 5.39E-23       |
| <i>HRH1</i>        | -0.1649                      | 1.10E-22 | 1.44E-21       |
| <i>MTMR7</i>       | 0.1595                       | 1.72E-21 | 1.91E-20       |
| <i>SLAMF7</i>      | -0.1753                      | 4.27E-20 | 4.17E-19       |
| <i>GSDMC</i>       | -0.2042                      | 4.85E-20 | 4.21E-19       |
| <i>S100A10</i>     | -0.1218                      | 8.34E-20 | 6.51E-19       |
| <i>ARNTL2</i>      | -0.1006                      | 3.62E-19 | 2.57E-18       |
| <i>CCDC70</i>      | -0.1410                      | 1.63E-16 | 9.79E-16       |
| <i>SNORD114.29</i> | -0.1990                      | 1.63E-16 | 9.79E-16       |
| <i>SLPI</i>        | -0.1375                      | 1.90E-16 | 1.06E-15       |
| <i>MYEOV</i>       | -0.1251                      | 5.30E-16 | 2.76E-15       |
| <i>HOXC12</i>      | 0.1022                       | 1.18E-15 | 5.13E-15       |
| <i>UCA1</i>        | -0.1927                      | 1.18E-15 | 5.13E-15       |
| <i>KRTAP2.4</i>    | -0.2117                      | 1.85E-15 | 7.61E-15       |
| <i>LOC728392</i>   | 0.2163                       | 3.42E-15 | 1.34E-14       |
| <i>SHROOM3</i>     | -0.1247                      | 5.67E-15 | 2.11E-14       |
| <i>ISG20L2</i>     | -0.1166                      | 6.08E-15 | 2.16E-14       |
