# Supplementary material for: Classification and Prognosis Analysis of Pancreatic Cancer Based on DNA Methylation Profile and Clinical Information
Source: MDPI journal article supplement (doi:10.3390/genes13101913), 2022-10-21
Supplement: s1 [file s1]

**Table S1.** Example of partial methylation profiles after pretreatment

| <b>Gene.Symbol</b> | <b>TCGA.S4.A8RP.01</b> | <b>TCGA.IB.A6UG.01</b> | <b>TCGA.US.A776.01</b> |
|--------------------|------------------------|------------------------|------------------------|
| <i>A1BG</i>        | 0.59065                | 0.5907                 | 0.2609                 |
| <i>ACSS3</i>       | 0.1648                 | 0.3682                 | 0.2157                 |
| <i>ADAM12</i>      | 0.5187                 | 0.4384                 | 0.5310                 |
| <i>ADAMTS18</i>    | 0.4055                 | 0.4141                 | 0.3650                 |
| <i>ADAP1</i>       | 0.4286                 | 0.5211                 | 0.2703                 |
| <i>ADCY1</i>       | 0.2064                 | 0.4376                 | 0.1136                 |
| <i>ADCY3</i>       | 0.3366                 | 0.4806                 | 0.3305                 |
| <i>ADH4</i>        | 0.5180                 | 0.7367                 | 0.4173                 |
| <i>ALPI</i>        | 0.6066                 | 0.5532                 | 0.4839                 |
| <i>ALX1</i>        | 0.3484                 | 0.3662                 | 0.2939                 |
| <i>ANKRD20B</i>    | 0.4954                 | 0.5062                 | 0.5824                 |
