# Supplementary figures and images for: Classification and Prognosis Analysis of Pancreatic Cancer Based on DNA Methylation Profile and Clinical Information
Source: MDPI journal article supplement (doi:10.3390/genes13101913), 2022-10-21

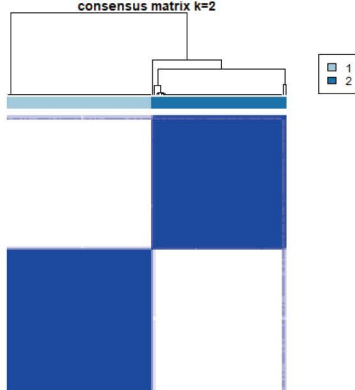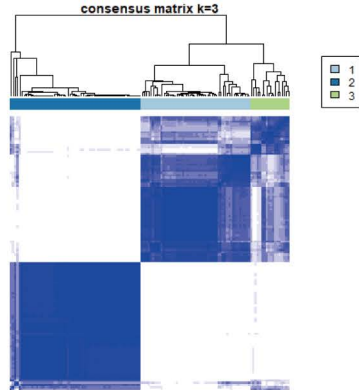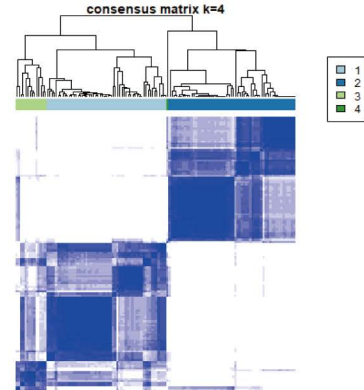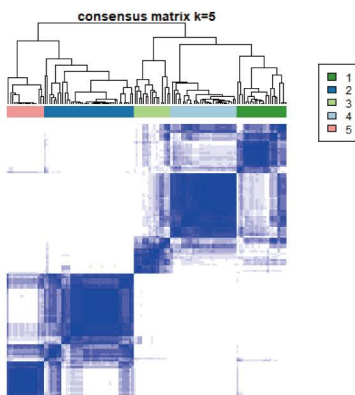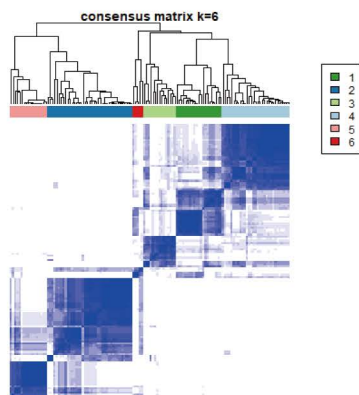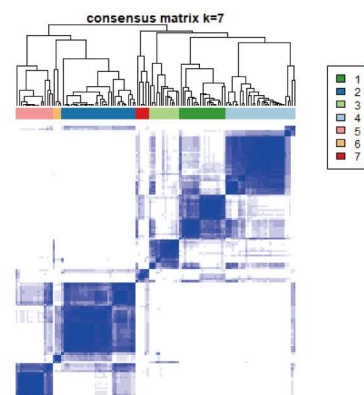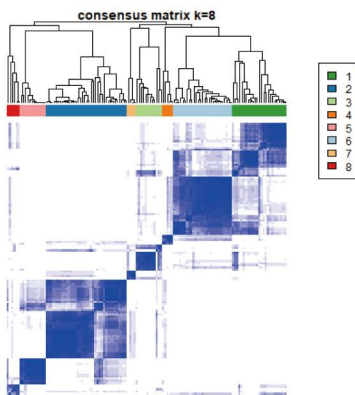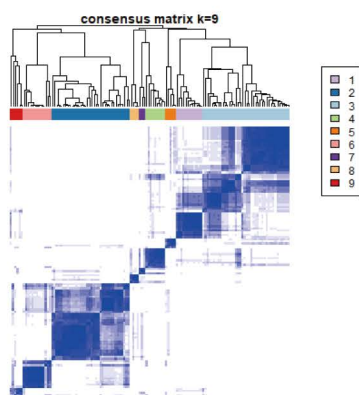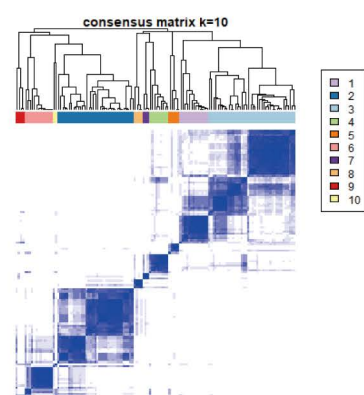

Supplement: s1 [file s1]

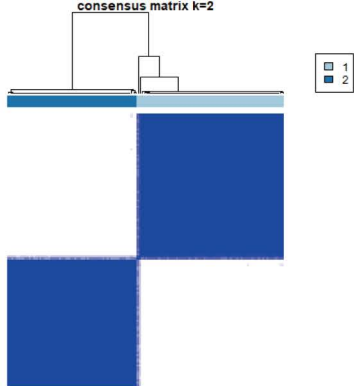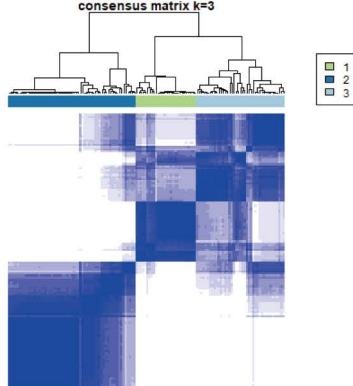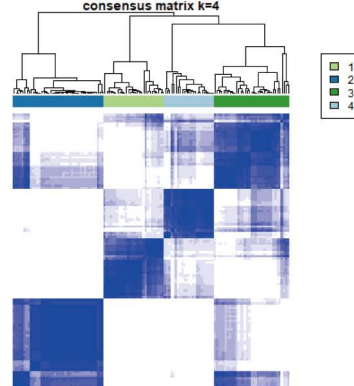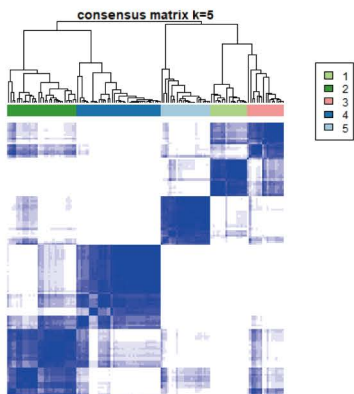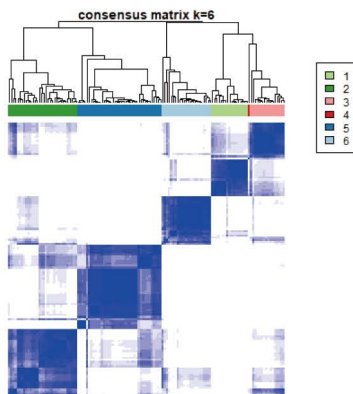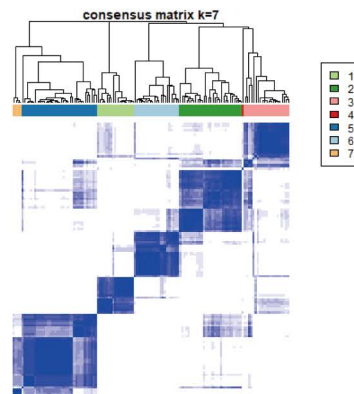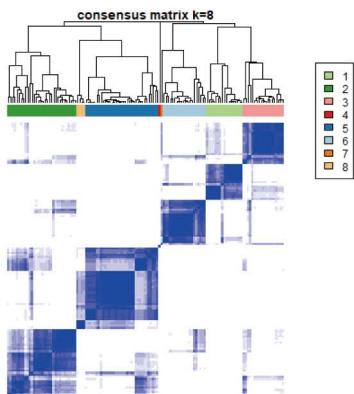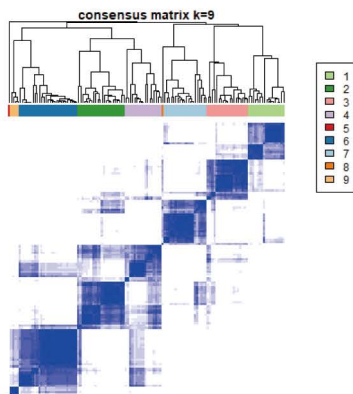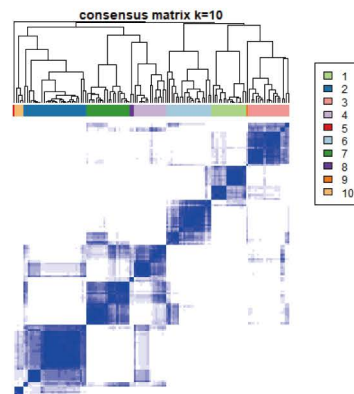

Supplement: s1 [file s1]
